# Supplementary material for: Simple haptotactic gradient generation within a triangular microfluidic channel
Source: Royal Society of Chemistry journal article supplement (doi:10.1039/b924222h), 2010-01-01
Supplement: b924222h.pdf [file b924222h.pdf]

## Supplementary Data

**Supplementary Table I** Parameters used in the simulation

| Parameters              | Description                               | Value                                 |
|-------------------------|-------------------------------------------|---------------------------------------|
| $\eta$                  | dynamic viscosity                         | $7.98\text{e-}4 \text{ PaS}$          |
| $\rho$                  | fluid's density                           | $1000 \text{ kg/m}^3$                 |
| $D$                     | diffusion coefficient of bulk molecules** | $8.5\text{e-}12 \text{ m}^2/\text{s}$ |
| $D_s$                   | surface diffusivity                       | $1\text{e-}13 \text{ m}^2/\text{s}$   |
| $c_0$                   | Initial bulk concentration **             | $2\text{e-}4 \text{ mol/m}^3$         |
| $k_{\text{ads}} \theta$ | rate constant for adsorption *            | $1\text{e-}3 \text{ s}^{-1}$          |
| $k_{\text{des}}$        | rate constant for desorption*             | $1\text{e-}6 \text{ s}^{-1}$          |

\* Obtained from Calonder et al., *PNAS*, 2001; \*\* Corresponds to the experimental conditions, as described in the main text

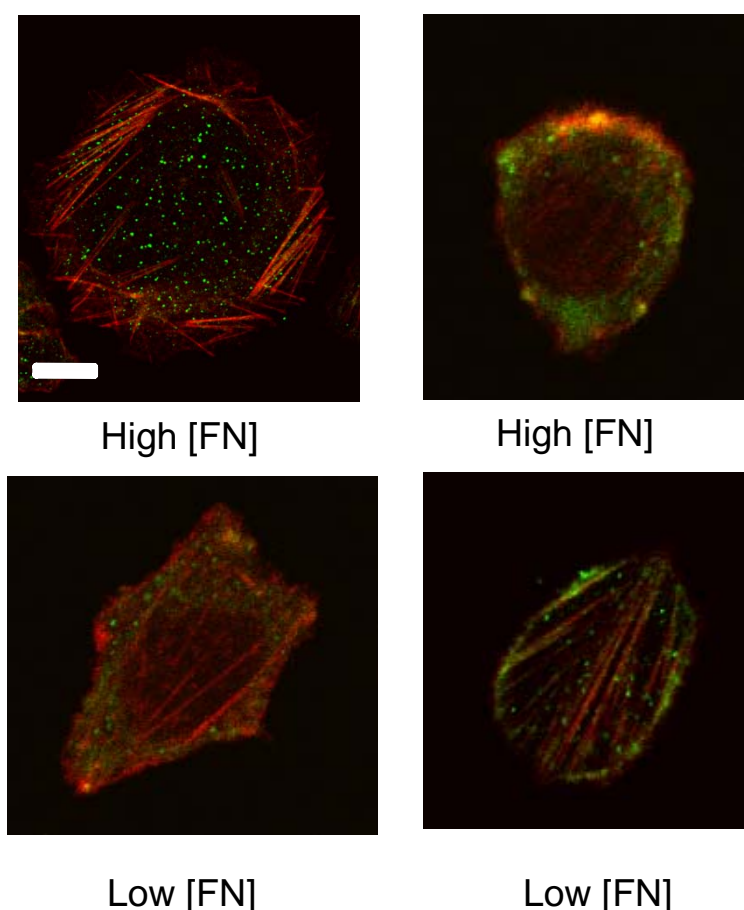

**Figure S1** Comparison of the immunostained CHO cells cultured inside the channel (left panels) and on a coverslip outside the channel (right panel). The FN concentrations used for coating the coverslip outside the channel are  $100 \mu\text{g/ml}$  (high) and  $40 \mu\text{g/ml}$  (low), with 1 hr. coating time. Actin stress fibers (red) were labelled using phalloidin staining and myosin heavy chain II (MHCII) was labelled

using an anti-MHCII antibody (green) as described in Methods.
